# Supplementary material
Source: PubMed Central journal article supplement (PMC6615540)
Supplement: kepi-14-08-1615353-s002.pdf [file kepi-14-08-1615353-s002.pdf]

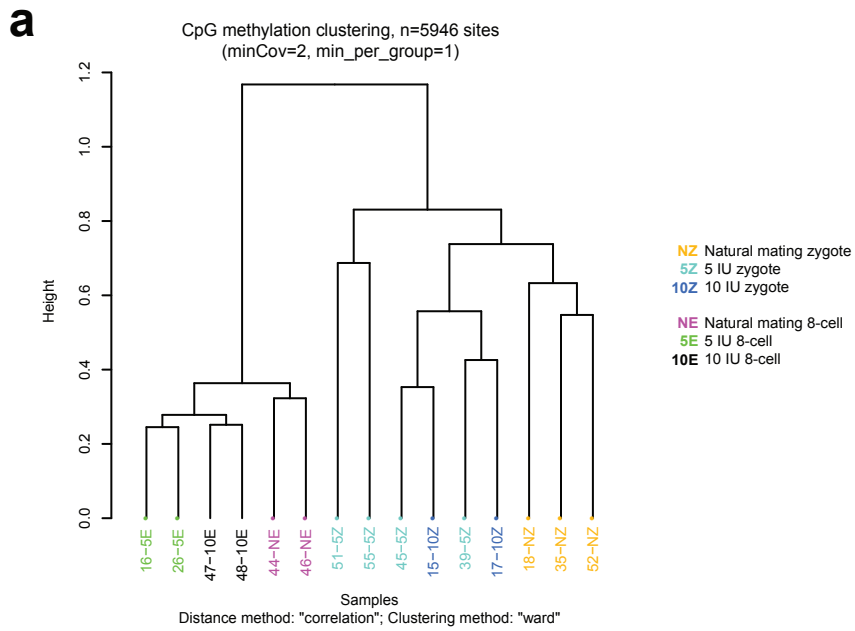

**b**

**NM Zygote vs 8-cell**

**5IU Zygote vs 8-cell**

**10IU Zygote vs 8-cell**

High in Zygote

High in 8-cell

High in Zygote

High in 8-cell

High in Zygote

High in 8-cell

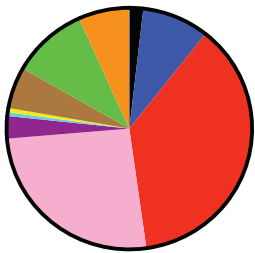

Total=7286

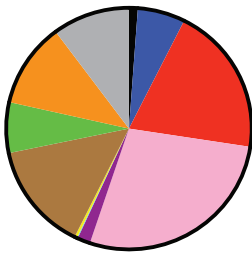

Total=3702

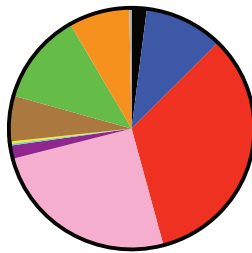

Total=43846

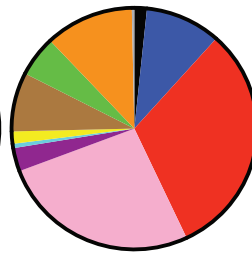

Total=1214

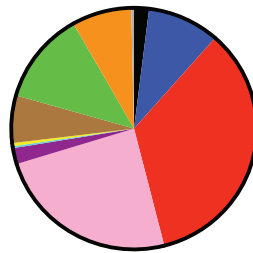

Total=18546

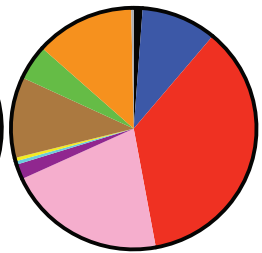

Total=1539

**Zygote NM vs 5IU**

**Zygote NM vs 10IU**

High in NM

High in 5IU

High in NM

High in 10IU

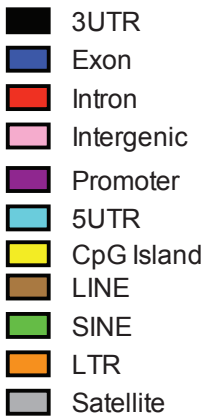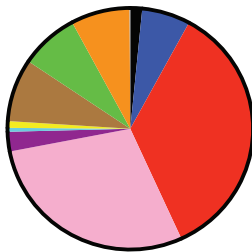

Total=7744

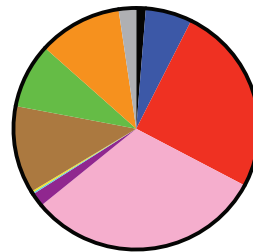

Total=10885

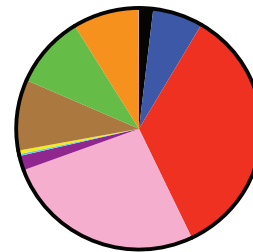

Total=8847

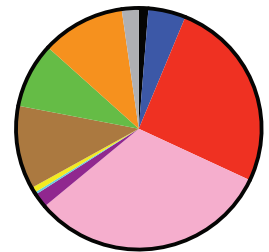

Total=6525

**8-cell NM vs 5IU**

**8-cell NM vs 10IU**

High in NM

High in 5IU

High in NM

High in 10IU

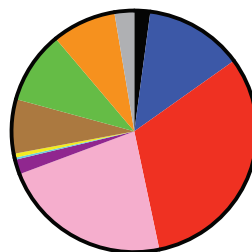

Total=9467

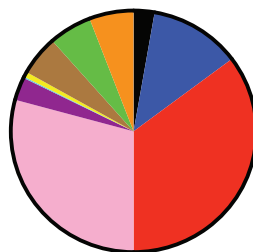

Total=582

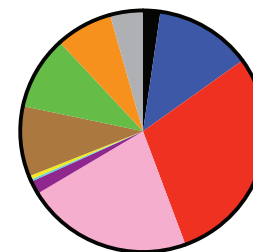

Total=7034

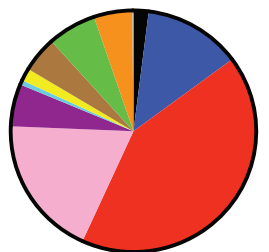

Total=653
